# Supplementary material
Source: MDPI journal article supplement (https://www.mdpi.com/2504-2289/7/1/15)
Supplement: s1 [file s1]

Archive with 2 entries (2 files):
- PRISMA_2020_abstract_checklist.pdf
- PRISMA_2020_checklist.pdf
